# Supplementary material for: Improved photocatalytic activity and enhanced germination rate of Oryza sativa and urea sensor development utilizing fabricated NiO·SrCO 3 ·ZnO nanomaterials
Source: Royal Society of Chemistry journal article supplement (doi:10.1039/d5ra06318c), 2025-01-01
Supplement: d5ra06318c1.pdf [file d5ra06318c1.pdf]

## Supporting Information

### Improved photocatalytic activity and enhanced germination rate of *Oryza Sativa* and urea sensor development utilizing fabricated NiO·SrCO<sub>3</sub>·ZnO nanomaterials

Shubrojit Dey <sup>a</sup>, Pallab Chandra Saha <sup>a,b</sup>, Md Abdus Subhan <sup>a\*</sup>, M. M. Alam <sup>c</sup>, Mohammad Al-Mamun <sup>d</sup>, Didar Hossain <sup>e</sup>, Abul Kalam Azad <sup>e</sup>, Amjad E. Alsafrani <sup>f</sup>, Abdulkarim Albishri <sup>g</sup>, and Mohammed M. Rahman <sup>h\*</sup>

<sup>a</sup> Department of Chemistry, School of Physical Sciences, Shahjalal University of Science and Technology, Sylhet-3114, Bangladesh

<sup>b</sup> Department of Chemistry, University of Virginia, Charlottesville, VA, 22904 USA

<sup>c</sup> Department of Chemical Engineering, Z. H. Sikder University of Science and Technology (ZHSUST), Shariatpur-8024, Bangladesh ([alam-mahmud@hotmail.com](mailto:alam-mahmud@hotmail.com))

<sup>d</sup> Centre for Clean Environment and Energy, Griffith School of Environment, Gold Coast Campus, Griffith University, QLD 4222, Australia

<sup>e</sup> Department of Genetic Engineering & Biotechnology, Shahjalal University of Science and Technology, Sylhet-3114, Bangladesh

<sup>f</sup> Department of Chemistry, College of Science, University of Jeddah, Jeddah, Saudi Arabia ([aalsafrani@uj.edu.sa](mailto:aalsafrani@uj.edu.sa))

<sup>g</sup> Department of Chemistry, College of Sciences & Arts, King Abdulaziz University, Rabigh, Kingdom of Saudi Arabia ([akalbishri@kau.edu.sa](mailto:akalbishri@kau.edu.sa))

<sup>h</sup> Center of Excellence for Advanced Materials Research (CEAMR) & Chemistry department, Faculty of Science, King Abdulaziz University, Saudi Arabia ([mmrahman@kau.edu.sa](mailto:mmrahman@kau.edu.sa))

(\*Corresponding author's e-mail: [subhan-che@sust.edu](mailto:subhan-che@sust.edu) and [mmrahman@kau.sa.edu](mailto:mmrahman@kau.sa.edu) )

## List of Supplemental Figures

**Figure S1.** SEM image of ternary  $\text{NiO} \cdot \text{SrCO}_3 \cdot \text{ZnO}$  NMs at different magnification

**Figure S2.** SEM–EDS mapping of  $\text{NiO} \cdot \text{SrCO}_3 \cdot \text{ZnO}$  NMs (a) Nickel, (b) Strontium, (c) Zinc, (d) Oxygen, and (e) Overlap of all of them

**Figure S3.** UV–Visible spectra of  $\text{NiO} \cdot \text{SrCO}_3 \cdot \text{ZnO}$  NMs at different calcined temperatures

**Figure S4.** PL spectra of  $\text{NiO} \cdot \text{SrCO}_3 \cdot \text{ZnO}$  NMs at (a) 400 °C and (b) 900 °C calcined temperature

**Figure S5.** UV–Visible spectra of MB dye (5 ppm) removal using  $\text{NiO} \cdot \text{SrCO}_3 \cdot \text{ZnO}$  NMs under visible light irradiation for 240 minutes, (a–e) dose effect, and (f–h) different calcined temperature effect.

**Figure S6.** *Oryza sativa* (a) germination percentage and (b) average length of radicle using different concentrations of  $\text{NiO} \cdot \text{SrCO}_3 \cdot \text{ZnO}$  NMs

## List of Supplemental Tables

**Table S1.** I and RIR value of components (information were listed from MDI Jade 6.5 software)

**Table S2.** PL spectra of  $\text{NiO} \cdot \text{SrCO}_3 \cdot \text{ZnO}$  NMs compared with single oxide calcined at 600 °C temperature.

**Table S3.** PL spectra of  $\text{NiO} \cdot \text{SrCO}_3 \cdot \text{ZnO}$  NMs at different calcined temperature

**Table S4.** Values of rate constant (k) and  $r^2$  for dye removal kinetic

**Table S5.** Antibacterial activities of  $\text{NiO} \cdot \text{SrCO}_3 \cdot \text{ZnO}$  NMs against pathogenic bacteria

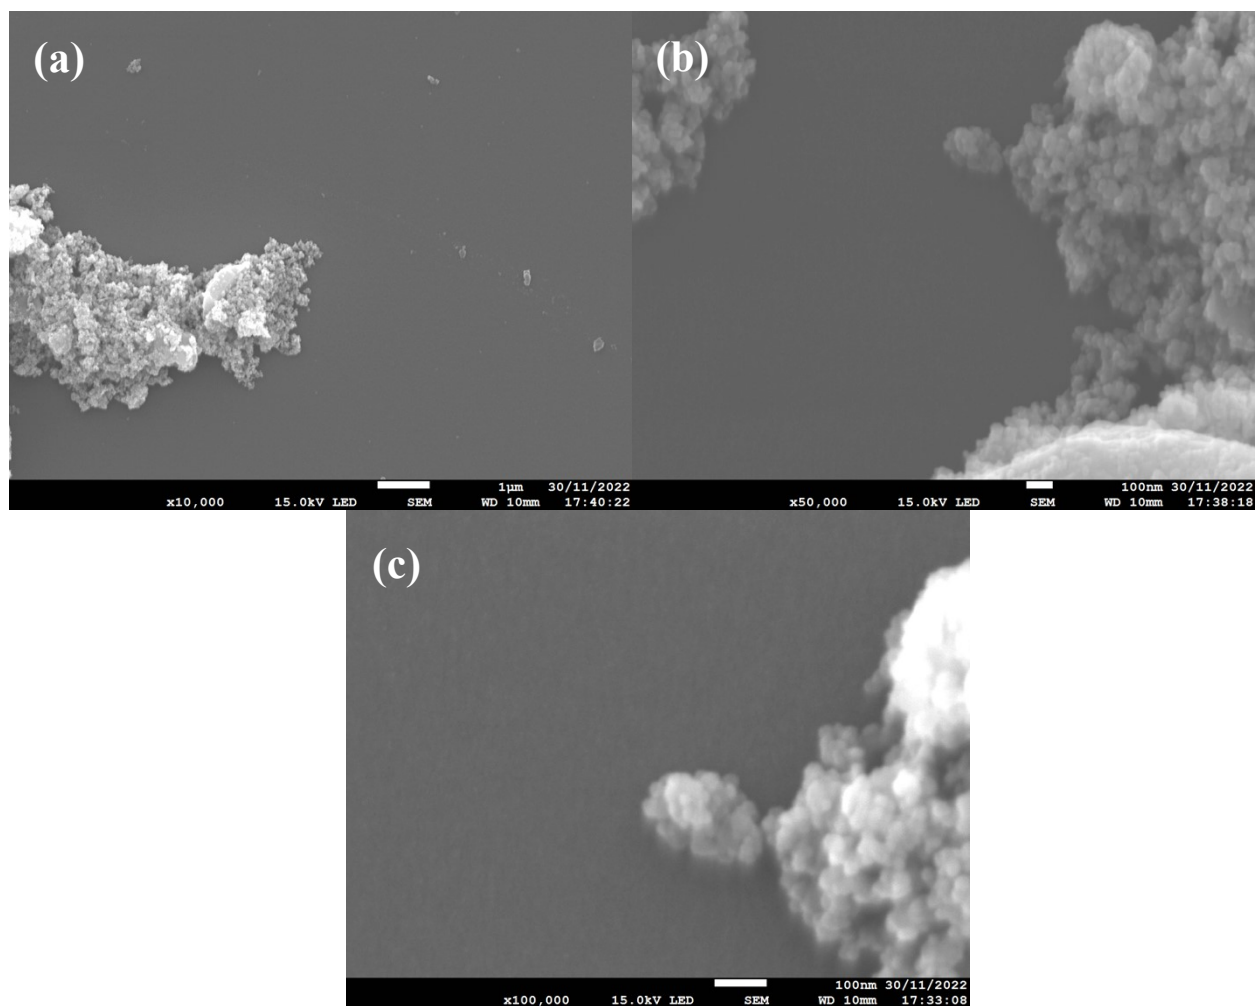

**Figure S1.** SEM image of ternary  $\text{NiO} \cdot \text{SrCO}_3 \cdot \text{ZnO}$  NMs at different magnification

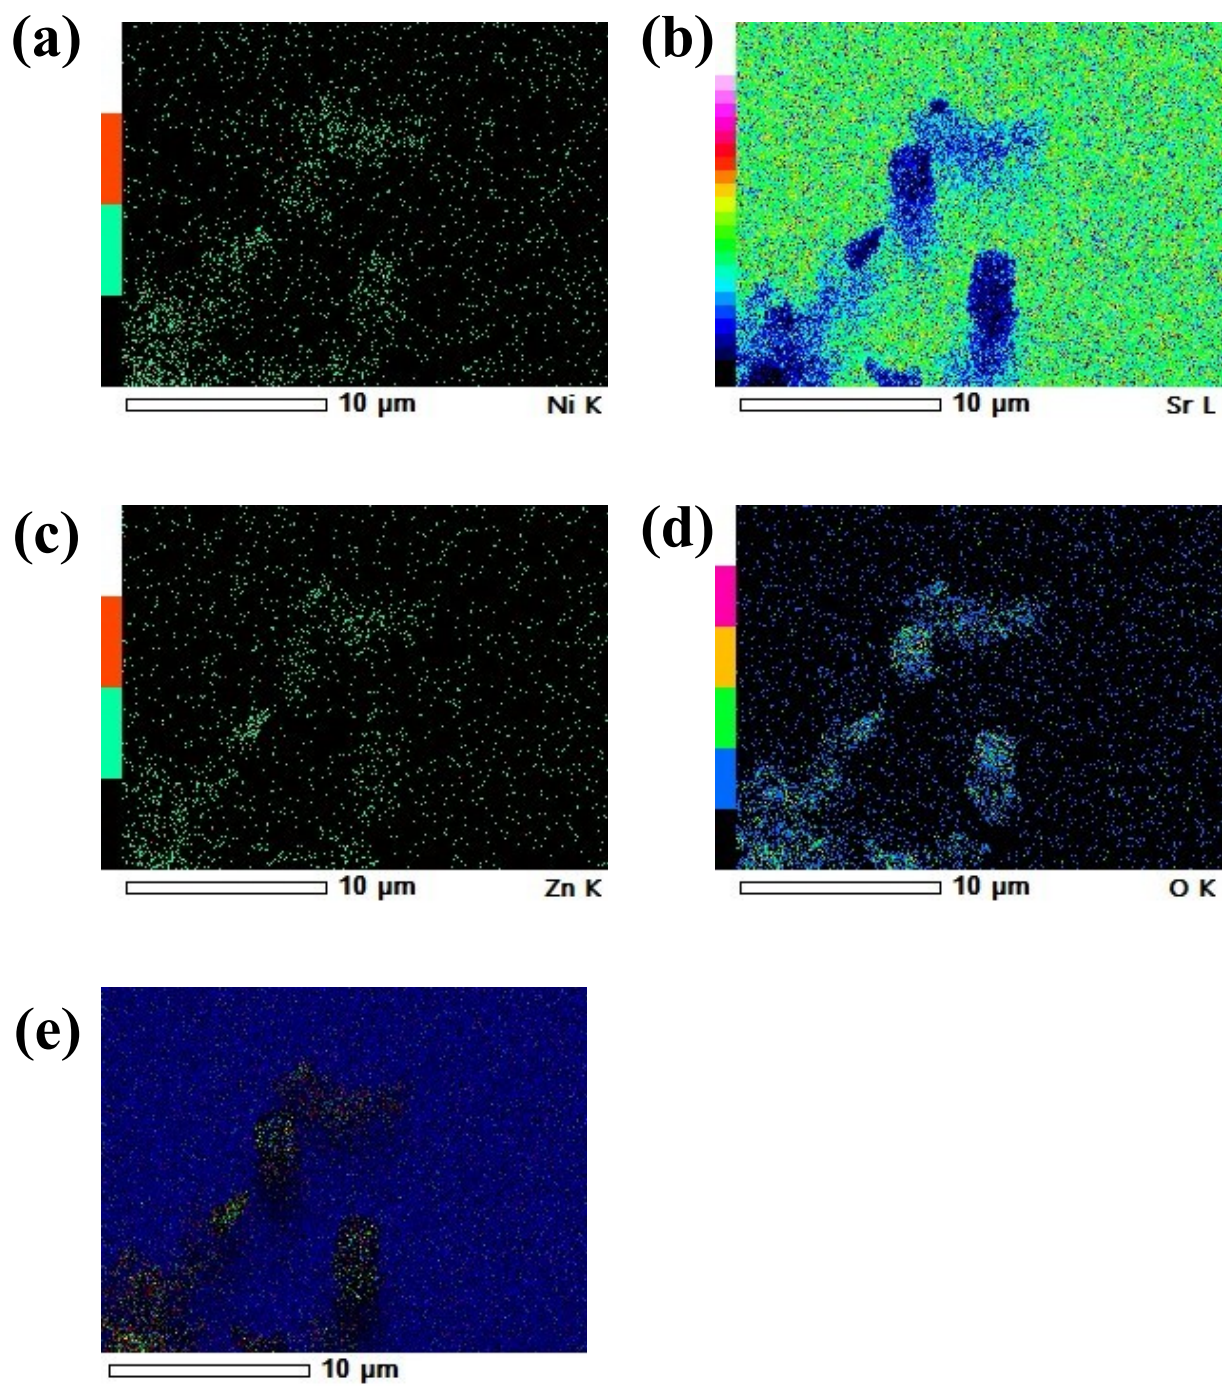

**Figure S2.** SEM-EDS mapping of  $\text{NiO} \cdot \text{SrCO}_3 \cdot \text{ZnO}$  NMs (a) Nickel, (b) Strontium, (c) Zinc, (d) Oxygen, and (e) Overlap of all of them

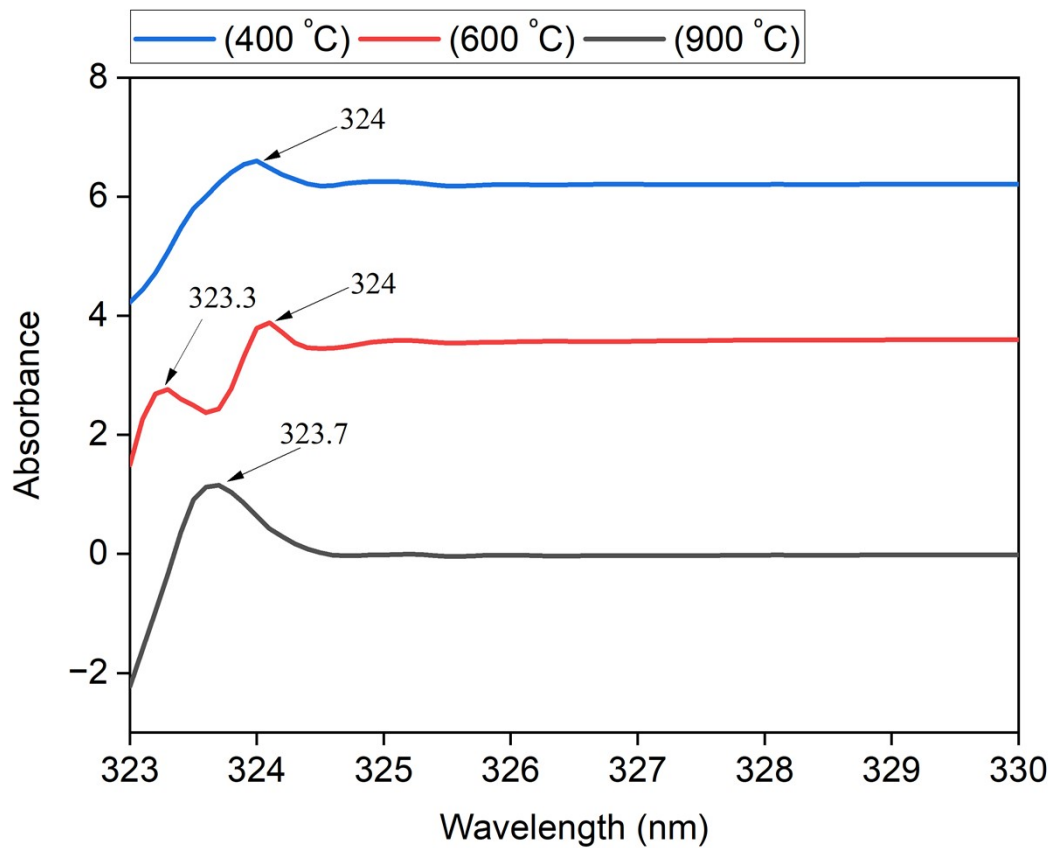

**Figure S3.** UV-Visible spectra of  $\text{NiO} \cdot \text{SrCO}_3 \cdot \text{ZnO}$  NMs at different calcined temperatures

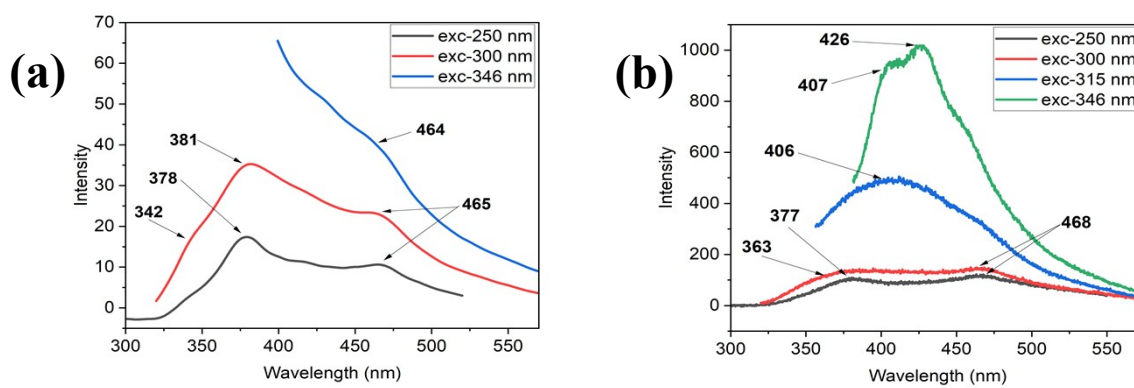

**Figure S4.** PL spectra of  $\text{NiO} \cdot \text{SrCO}_3 \cdot \text{ZnO}$  NMs at (a) 400 °C and (b) 900 °C calcined temperature

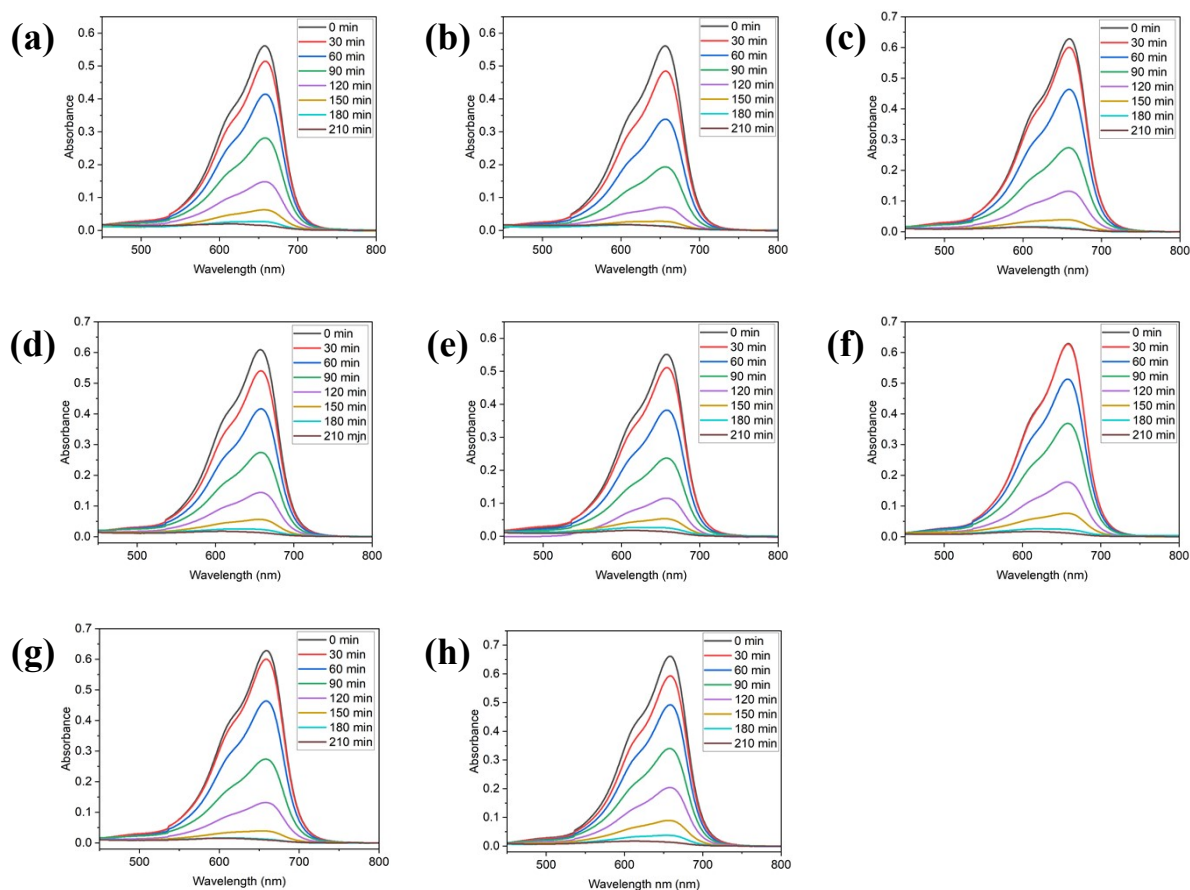

**Figure S5.** UV–Visible spectra of MB dye (5 ppm) removal using  $\text{NiO} \cdot \text{SrCO}_3 \cdot \text{ZnO}$  NMs under visible light irradiation for 240 minutes, (a–e) dose effect, and (f–h) different calcined temperature effect

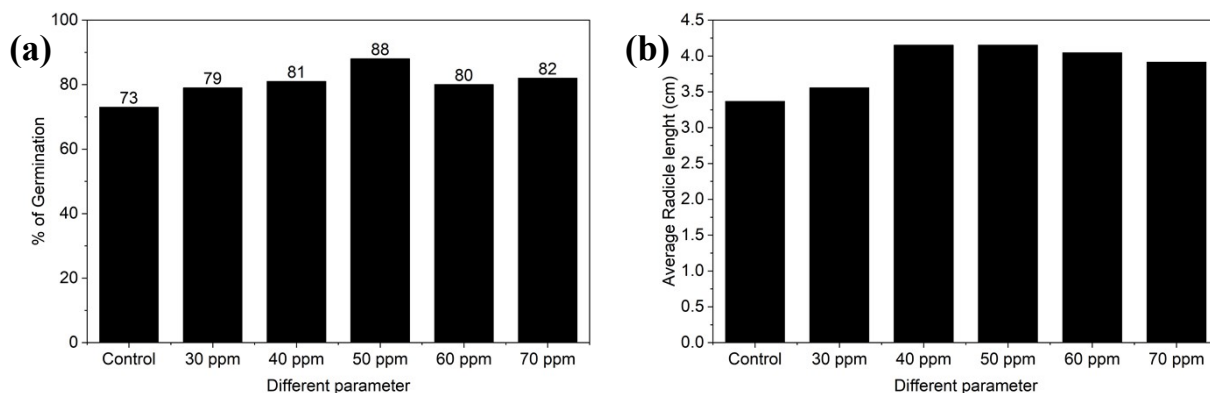

**Figure S6.** *Oryza sativa* (a) germination percentage and (b) average length of radicle using different concentrations of NiO·SrCO<sub>3</sub>·ZnO NMs

**Table S1.** I and RIR value of components (information were listed from MDI Jade 6.5 software)

| Component         | I value | RIR value |
|-------------------|---------|-----------|
| NiO               | 12048   | 4.74      |
| SrCO <sub>3</sub> | 35379   | 3.8       |
| ZnO               | 22473   | 5.53      |

**Table S2.** PL spectra of NiO·SrCO<sub>3</sub>·ZnO NMs compared with single oxide calcined at 600 °C temperature.

|                            | Excitation Wavelength (nm) | Emission Wavelength (nm) |
|----------------------------|----------------------------|--------------------------|
| NiO·SrCO <sub>3</sub> ·ZnO | 250                        | 382, 466                 |
|                            | 300                        | 344, 382, 466            |
|                            | 350                        | 463                      |
| NiO                        | 250                        | 373, 459                 |
|                            | 307                        | 324, 362, 466            |
| SrCO <sub>3</sub>          | 300                        | 407                      |
|                            | 350                        | 403, 426, 452            |
| ZnO                        | 250                        | 381, 468                 |
|                            | 300                        | 343, 381, 468            |
|                            | 350                        | 466                      |

**Table S3.** PL spectra of NiO·SrCO<sub>3</sub>·ZnO NMs at different calcined temperature

| Calcined temperature (°C) | Excitation wavelength (nm) | Emission wavelength (nm) |
|---------------------------|----------------------------|--------------------------|
| 400                       | 250                        | 378, 465                 |
|                           | 300                        | 342, 381, 465            |
|                           | 346                        | 464                      |
| 600                       | 250                        | 382, 466                 |
|                           | 300                        | 344, 382, 466            |
|                           | 350                        | 463                      |
| 900                       | 250                        | 377, 468                 |
|                           | 300                        | 363, 468                 |
|                           | 315                        | 406                      |
|                           | 346                        | 407, 426                 |

| Observation | k (min <sup>-1</sup> ) | r <sup>2</sup> |
|-------------|------------------------|----------------|
| pH 4        | 0.0005                 | 0.666          |
| pH 7        | 0.0134                 | 0.9301         |
| pH 9.2      | 0.0225                 | 0.9316         |

**Table S4.** Values of rate constant (k) and r<sup>2</sup> for dye removal kinetics

**Table S5.** Antibacterial activities of NiO·SrCO<sub>3</sub>·ZnO NMs against pathogenic bacteria

| Bacteria culture              | Diameter of inhibition zone, D <sub>iz</sub> , (mm) |    |    | Diameter of well, D <sub>w</sub> , (mm) | Ratio, R= D <sub>iz</sub> /D <sub>w</sub> |      |      |
|-------------------------------|-----------------------------------------------------|----|----|-----------------------------------------|-------------------------------------------|------|------|
|                               | 1                                                   | 2  | 3  |                                         | 1                                         | 2    | 3    |
| <i>Staphylococcus aureus</i>  | 15                                                  | 18 | 18 | 6                                       | 2.5                                       | 3.0  | 3.0  |
| <i>Klebsiella pneumoniae</i>  | 15                                                  | 18 | 17 |                                         | 2.5                                       | 3.0  | 2.83 |
| <i>Pseudomonas aeruginosa</i> | 17                                                  | 18 | 20 |                                         | 2.83                                      | 3.0  | 3.33 |
| <i>Proteus mirabilis</i>      | 17                                                  | 17 | 17 |                                         | 2.83                                      | 2.83 | 2.83 |
